# Supplementary material for: Metabolomic homeostasis shifts after callus formation and shoot regeneration in tomato
Source: PubMed Central journal article supplement (PMC5421760; doi:10.1371/journal.pone.0176978), 2017-05-08
Supplement: pone.0176978.s002.pdf [file pone.0176978.s002.pdf]

**S2 Table:** Sequences of primers used for quantitative real-time PCR of TOR signaling pathway genes.

| <b>Name of Primer/Gene ID</b> | <b>Orientation</b> | <b>Sequence of primer(5'→3')</b> |
|-------------------------------|--------------------|----------------------------------|
| TOR/Solyc01g106770.2          | Forward            | CCAACCTTGTCTCAAAGGAGCTTA         |
|                               | Reverse            | TTGTGTTACCAAAAATACAGACG          |
| RAPTOR/Solyc09g014780.2       | Forward            | GCCAAATCTGTTAAGTCAACTGG          |
|                               | Reverse            | GTCCTCCATTCATATCAAACCAA          |
| Lst8/Solyc03g059310.2         | Forward            | AGTCAAGATTTGGAATGTGGATG          |
|                               | Reverse            | TCAGAAGATGCTGTGATGAGAAA          |
| s6K/Solyc03g095510.2.1        | Forward            | GCATAATGCACAGGGATCTAAAG          |
|                               | Reverse            | CAAAGAGTTGGATCTCGTGTCT           |
| β-ACTIN/FJ532351.1            | Forward            | GTCCCTATTTACGAGGGTTATGC          |
|                               | Reverse            | CAGTTAAATCACGACCAGCAAGATT        |
| UBIQUITIN 3/X58253.1          | Forward            | GCCGACTACAACATCCAGAAGG           |
|                               | Reverse            | TGCAACACAGCGAGCTTAACC            |
