# Supplementary material for: Metabolomic homeostasis shifts after callus formation and shoot regeneration in tomato
Source: PubMed Central journal article supplement (PMC5421760; doi:10.1371/journal.pone.0176978), 2017-05-08
Supplement: pone.0176978.s003.pdf [file pone.0176978.s003.pdf]

**S3 Table:** List of samples and its score for PC1 to PC5 used for preparation of PCA graph (Fig 2). For each samples five replicates, designated as 1, 2... 5 were used. Values were obtained using statistical analysis software (MS-DIAL) (37).

| S.No. | Identity of Sample             | t1 (PC1) | t2(PC2)  | t3(PC3)  | t4(PC4)  | t5(PC5)  |
|-------|--------------------------------|----------|----------|----------|----------|----------|
| 1.    | WT cotyledon 1                 | -14.9955 | 0.865342 | -1.21935 | -0.40824 | -0.91243 |
| 2.    | WT cotyledon 2                 | -14.9926 | 0.880337 | -1.22462 | -0.42216 | -0.90282 |
| 3.    | WT cotyledon 3                 | -14.9962 | 0.875863 | -1.2245  | -0.4156  | -0.90204 |
| 4.    | WT cotyledon 4                 | -14.9952 | 0.878954 | -1.22667 | -0.42075 | -0.90413 |
| 5.    | WT cotyledon 5                 | -14.9946 | 0.876001 | -1.22758 | -0.41914 | -0.9046  |
| 6.    | WT callus 1                    | 14.65433 | 2.265387 | -8.96241 | 0.980778 | 2.012335 |
| 7.    | WT callus 2                    | 6.953675 | 1.341199 | -6.66887 | 1.25539  | 2.214846 |
| 8.    | WT callus 3                    | 13.75756 | 2.188601 | -8.8133  | 2.241374 | 1.606939 |
| 9.    | WT callus 4                    | 5.073209 | -0.58268 | -5.20761 | -0.49456 | 2.697948 |
| 10.   | WT callus 5                    | 8.015938 | -0.18716 | -6.25933 | 0.284866 | 2.123866 |
| 11.   | WT regenerated shoot 1         | -2.92366 | 0.863427 | -3.47241 | -0.18259 | 1.759262 |
| 12.   | WT regenerated shoot 2         | 6.121923 | 0.803847 | -5.25238 | -0.0917  | 3.245501 |
| 13.   | WT regenerated shoot 3         | 3.52532  | -0.60289 | -3.79546 | -0.59502 | 3.19924  |
| 14.   | WT regenerated shoot 4         | 3.107793 | 0.107602 | -4.35491 | -0.38583 | 2.520723 |
| 15.   | WT regenerated shoot 5         | 3.460388 | 0.649344 | -4.51336 | -0.16466 | 2.879525 |
| 16.   | <i>shr</i> cotyledon 1         | -14.9995 | 0.883323 | -1.22817 | -0.42742 | -0.91838 |
| 17.   | <i>shr</i> cotyledon 2         | -15.0027 | 0.884768 | -1.22778 | -0.42871 | -0.92747 |
| 18.   | <i>shr</i> cotyledon 3         | -15.0076 | 0.884874 | -1.22868 | -0.42579 | -0.93481 |
| 19.   | <i>shr</i> cotyledon 4         | -15.0068 | 0.882585 | -1.22815 | -0.42565 | -0.93152 |
| 20.   | <i>shr</i> cotyledon 5         | -15.0048 | 0.881963 | -1.22731 | -0.42515 | -0.92922 |
| 21.   | <i>shr</i> callus 1            | 15.62906 | 5.216974 | 4.714867 | -5.13575 | -1.59706 |
| 22.   | <i>shr</i> callus 2            | 11.76894 | 6.049706 | 2.508966 | -2.75255 | -1.92895 |
| 23.   | <i>shr</i> callus 3            | 6.19495  | -2.95889 | 8.673294 | -11.0439 | 1.973481 |
| 24.   | <i>shr</i> callus 4            | 30.56472 | 17.28262 | -4.37012 | 0.646705 | -4.9618  |
| 25.   | <i>shr</i> callus 5            | 6.152444 | -3.31047 | 9.814799 | -10.4184 | 2.167158 |
| 26.   | <i>shr</i> regenerated shoot 1 | 6.047735 | 5.328792 | 1.801241 | -1.72482 | -0.80156 |
| 27.   | <i>shr</i> regenerated shoot 2 | 6.446259 | 2.748685 | 3.609126 | -1.09924 | -0.97289 |
| 28.   | <i>shr</i> regenerated shoot 3 | 4.781036 | 4.723015 | 1.631016 | -1.91518 | 0.455321 |
| 29.   | <i>shr</i> regenerated shoot 4 | 12.99782 | 5.558468 | -0.56217 | -1.12934 | -0.23472 |
| 30.   | <i>shr</i> regenerated shoot 5 | 10.23333 | 3.308742 | 3.397117 | -0.31282 | -2.33282 |
| 31.   | <i>pct</i> cotyledon 1         | -14.9734 | 0.873323 | -1.2347  | -0.41776 | -0.85124 |
| 32.   | <i>pct</i> cotyledon 2         | -14.9727 | 0.874104 | -1.23578 | -0.41926 | -0.85041 |
| 33.   | <i>pct</i> cotyledon 3         | -14.9707 | 0.8744   | -1.23127 | -0.41834 | -0.84907 |
| 34.   | <i>pct</i> cotyledon 4         | -14.9719 | 0.869432 | -1.23315 | -0.41664 | -0.85545 |
| 35.   | <i>pct</i> cotyledon 5         | -14.9742 | 0.874245 | -1.23572 | -0.41923 | -0.853   |
| 36.   | <i>pct</i> callus 1            | 9.825215 | -11.6716 | -2.69388 | 1.95548  | -1.95057 |
| 37.   | <i>pct</i> callus 2            | 4.944697 | -18.3946 | 2.194846 | -1.45598 | 0.128084 |
| 38.   | <i>pct</i> callus 3            | 6.274541 | -19.3407 | 2.663726 | -1.36558 | 1.579887 |
| 39.   | <i>pct</i> callus 4            | 14.71043 | -15.9872 | -1.59764 | 4.593058 | -3.33938 |

|     |                                |          |          |          |          |          |
|-----|--------------------------------|----------|----------|----------|----------|----------|
| 40. | <i>pct</i> callus 5            | 9.971535 | -14.5735 | -1.18445 | 4.569507 | -4.21722 |
| 41. | <i>pct</i> regenerated shoot 1 | 1.583083 | 3.794905 | 9.627235 | 7.795511 | 1.987531 |
| 42. | <i>pct</i> regenerated shoot 2 | -0.19169 | 2.542791 | 10.44703 | 8.121632 | 2.322484 |
| 43. | <i>pct</i> regenerated shoot 3 | -0.47287 | 3.009223 | 10.27859 | 7.970128 | 2.01426  |
| 44. | <i>pct</i> regenerated shoot 4 | -1.09999 | 4.622435 | 8.069116 | 5.049344 | 3.506419 |
| 45. | <i>pct</i> regenerated shoot 5 | 6.750509 | 2.044509 | 6.710744 | 1.114017 | -4.63123 |
