# Supplementary material for: Metabolomic homeostasis shifts after callus formation and shoot regeneration in tomato
Source: PubMed Central journal article supplement (PMC5421760; doi:10.1371/journal.pone.0176978), 2017-05-08
Supplement: pone.0176978.s004.pdf [file pone.0176978.s004.pdf]

**S4Table:** List of metabolites and its loading score for PC1 and PC2 of three stages viz. cotyledon, callus and regenerated shoot for WT, *shr* and *pct1-2* in combined, used for making collective PCA graph (Fig.2) Values were obtained using statistical analysis software (MS-DIAL) (37).

| S.No. | Metabolites                                                      | PC1          | PC2          |
|-------|------------------------------------------------------------------|--------------|--------------|
| 1.    | Erythritol                                                       | -0.021988812 | 0.00394531   |
| 2.    | Ribose                                                           | 0.003597147  | -0.001715208 |
| 3.    | L-Glycerol-2-phosphate                                           | 0.000455114  | 0.000137687  |
| 4.    | D-Psicopyranose                                                  | 0.018844629  | 0.006137419  |
| 5.    | Talofuranose                                                     | 0.003508932  | -0.00197034  |
| 6.    | Tagatose{BP}                                                     | 0.430961073  | -0.258332334 |
| 7.    | Sorbose                                                          | -0.000120666 | 0.061661532  |
| 8.    | Psicose                                                          | 0.237257613  | -0.098309687 |
| 9.    | Fructose                                                         | 0.345304637  | -0.160505075 |
| 10.   | Talopyranose                                                     | 0.091040044  | -0.060884831 |
| 11.   | D-Glucose (Z)                                                    | 0.174007959  | -0.085841356 |
| 12.   | Galactose                                                        | 0.037926129  | -0.040814792 |
| 13.   | Talose                                                           | 0.015370875  | -0.015524453 |
| 14.   | Glucose                                                          | 0.082584177  | -0.084870323 |
| 15.   | 1-Methyl- $\alpha$ -D-glucofuranoside                            | 0.061206307  | -0.211619126 |
| 16.   | $\beta$ -D-Glucopyranose                                         | 0.120735058  | -0.087469131 |
| 17.   | Galactonate                                                      | 0.004872665  | -0.002439285 |
| 18.   | myo-Inositol                                                     | 0.10533264   | -0.019407242 |
| 19.   | D-Glucopyranose                                                  | 0.23770279   | 0.360770202  |
| 20.   | 1-Methyl- $\beta$ -D-galactopyranoside                           | 0.001393003  | 0.007823691  |
| 21.   | Galactosylglycerol                                               | 0.00214206   | -0.001246753 |
| 22.   | Glucose-6-phosphate                                              | 0.000896591  | -0.001920598 |
| 23.   | myo-Inositol-2-P                                                 | 0.001104671  | 1.71387E-06  |
| 24.   | Maltitol                                                         | 0.000381989  | -0.000284108 |
| 25.   | 1,2,3-Butantriol                                                 | 0.001678692  | -0.000549977 |
| 26.   | Cellobiose(isomer 1)                                             | -6.36838E-05 | 0.000203459  |
| 27.   | Sucrose                                                          | 0.174563216  | -0.024248043 |
| 28.   | Turanose (isomer 1)                                              | 0.036478455  | -0.128134589 |
| 29.   | Cellobiose (isomer 2)                                            | 0.001027342  | -0.00377468  |
| 30.   | Turanose (isomer 2)                                              | 0.001393747  | -0.004885578 |
| 31.   | Trehalose                                                        | 0.001796729  | -0.000592215 |
| 32.   | $\alpha$ -D-Galactopyranosyl $\alpha$ -(1,4)-D-galactopyranoside | 0.0030355    | -0.001785158 |
| 33.   | Lactose                                                          | 0.001814773  | 0.000378934  |
| 34.   | Isomaltose                                                       | 0.000827571  | -0.000374746 |
| 35.   | Valine                                                           | 0.02010162   | 0.000822121  |
| 36.   | Alanine                                                          | 0.030120455  | -0.015572015 |
| 37.   | Serine                                                           | 0.011564951  | 0.004854238  |
| 38.   | Threonine                                                        | 0.007702392  | 0.002126332  |
| 39.   | Isoleucine                                                       | 0.009568701  | -0.000635509 |
| 40.   | Proline                                                          | 0.011370694  | 0.005809423  |

|     |                                   |              |              |
|-----|-----------------------------------|--------------|--------------|
| 41. | Glycine                           | 0.005172447  | -0.006049497 |
| 42. | Aspartate                         | 0.006075547  | -0.006567806 |
| 43. | Threonate                         | 0.003779486  | 0.00308947   |
| 44. | Glutamate                         | 0.008420334  | 0.004244251  |
| 45. | Phenylalanine                     | 0.002519787  | 0.000367693  |
| 46. | Asparagine                        | 0.077747807  | 0.068427955  |
| 47. | Glutamine                         | 0.298215401  | 0.219225938  |
| 48. | Lysine                            | 0.007744907  | 0.001517897  |
| 49. | Allantoin                         | 0.001266105  | 0.002075365  |
| 50. | Pentonate                         | 0.00141235   | -0.000462917 |
| 51. | Lyxonate                          | 0.001997474  | 1.99032E-05  |
| 52. | Gluconate                         | 0.004355779  | 0.000132681  |
| 53. | Palimitate                        | 0.018559915  | 0.004695722  |
| 54. | Glucarate                         | 0.00499326   | 0.004827302  |
| 55. | Galactarate                       | 0.002959364  | -0.006567306 |
| 56. | Linoleate                         | 0.000817666  | -9.5354E-05  |
| 57. | Stearate                          | 0.029125828  | 0.004159578  |
| 58. | Sinapinate                        | -0.000385502 | 0.000996568  |
| 59. | Caffeoylquininate                 | 0.004215301  | 0.007055412  |
| 60. | Ethanolamine                      | 0.016356099  | -0.005372545 |
| 61. | Ethanolamine P                    | 0.001154536  | 0.000857501  |
| 62. | Dopamine                          | 0.005461726  | 0.007948295  |
| 63. | Normetadrenaline                  | 0.002380351  | -0.00362003  |
| 64. | Noradrenaline                     | 0.003405748  | 0.002647377  |
| 65. | 5-Hydroxytryptamine               | 0.000893204  | 0.001804563  |
| 66. | Pyridine, 2-hydroxy               | 0.001825056  | -0.000228644 |
| 67. | Uridine                           | 0.000290878  | -0.000474817 |
| 68. | Adenosine                         | 0.000607212  | -0.000545296 |
| 69. | Borate                            | 0.018098254  | -0.008671463 |
| 70. | Pyruvate isomer 1                 | 0.000529748  | 0.000286592  |
| 71. | 1,3-Propanediol                   | 0.011211544  | -0.010423863 |
| 72. | Lactate                           | 0.017572216  | -0.069266416 |
| 73. | Glycolate                         | 0.001127669  | -0.000574924 |
| 74. | Pyruvate isomer 2                 | 0.000764467  | -0.000337921 |
| 75. | Oxalate                           | 0.002615083  | 0.000168587  |
| 76. | (R)-3-Hydroxybutyric acid         | 0.000807576  | -0.005618908 |
| 77. | Phosphorate                       | 0.037456897  | -0.007130139 |
| 78. | Succinate                         | 0.005281934  | -0.005160543 |
| 79. | Glycerate                         | 0.001016945  | -0.001025498 |
| 80. | 3-Methyl-2-ketopiperazine         | -0.013529207 | 0.002653532  |
| 81. | Pipecolate                        | -0.028350719 | 0.005560714  |
| 82. | Malate, 2-methyl-                 | 0.000243341  | 0.00029703   |
| 83. | Malate                            | 0.084281614  | -0.362179665 |
| 84. | 5-Oxoproline                      | 0.552913152  | 0.462211353  |
| 85. | GABA                              | 0.239742253  | -0.517908412 |
| 86. | Erythronate                       | 0.000418662  | 0.000710661  |
| 87. | 2-Imidazolidone-4-carboxylic acid | 0.002074663  | 0.000768955  |

|     |                   |              |              |
|-----|-------------------|--------------|--------------|
| 88. | Pentanedioic acid | 0.001059286  | 7.44259E-05  |
| 89. | Citrate           | 0.031455923  | -0.045284934 |
| 90. | Quinate           | 0.006819638  | 0.006567098  |
| 91. | Caffeate          | -0.002687469 | 0.000479218  |
