# Supplementary material for: Metabolomic homeostasis shifts after callus formation and shoot regeneration in tomato
Source: PubMed Central journal article supplement (PMC5421760; doi:10.1371/journal.pone.0176978), 2017-05-08
Supplement: pone.0176978.s005.pdf [file pone.0176978.s005.pdf]

**S5 Table:** List of the metabolites and their relative levels in cotyledon (Co), callus (Ca) and in regenerated shoot (RS) of *shr* and *pct1-2* mutants in comparison to WT tissue/organ of respective stage. Values in bold and in yellow color indicates significant changes with  $p \leq 0.05$ . The fold changes are calculated as Log2 ratios. RI, Metabolite detection based on the retention index; SD, Metabolite detection based on standards. For each metabolite the KEGG ID is written in the extreme right column of table.

| Stages:<br>Metabolites:                | <i>shr</i> Co/<br>WT Co | <i>shr</i> Ca/<br>WT Ca | <i>shr</i> RS/<br>WT RS | <i>pct1-2</i><br>Co/<br>WT Co | <i>pct1-2</i><br>Ca/<br>WT Ca | <i>pct1-2</i><br>RS/<br>WT RS | Method<br>of<br>Detectio<br>n | KEGG ID                                    |
|----------------------------------------|-------------------------|-------------------------|-------------------------|-------------------------------|-------------------------------|-------------------------------|-------------------------------|--------------------------------------------|
| Erythritol                             | <b>-1.007</b>           | 9.306                   | 7.127                   | -1.940                        | 8.951                         | 10.557                        | RI                            | C00503                                     |
| Ribose                                 | <b>1.307</b>            | 0.120                   | -0.506                  | 0.032                         | <b>0.356</b>                  | 0.367                         |                               | C00121                                     |
| L-Glycerol-2-phosphate                 | <b>-1.354</b>           | -0.263                  | 0.187                   | -2.229                        | <b>-0.900</b>                 | -0.971                        | RI                            | C03189                                     |
| D-Psicopyranose                        | -0.568                  | 0.119                   | -0.052                  | -0.923                        | <b>-1.079</b>                 | -0.757                        | RI                            | C06468                                     |
| Talofuranose                           | <b>-0.420</b>           | 0.304                   | 0.321                   | <b>-0.966</b>                 | 0.224                         | <b>-12.501</b>                | RI                            | Not found                                  |
| Tagatose{BP}                           | <b>-0.135</b>           | 0.341                   | 0.161                   | <b>-0.566</b>                 | 0.427                         | <b>-2.074</b>                 | RI                            | D09007                                     |
| Sorbose                                | <b>-1.334</b>           | 0.492                   | 0.210                   | <b>-2.184</b>                 | -0.069                        | <b>18.389</b>                 | RI                            | C00247                                     |
| Psicose                                | <b>-1.311</b>           | 0.161                   | 0.056                   | -1.046                        | <b>0.269</b>                  | -0.040                        | RI                            | C06468                                     |
| Fructose                               | <b>-1.411</b>           | 0.265                   | 0.132                   | <b>-2.291</b>                 | <b>0.326</b>                  | 0.113                         | SD                            | Not found                                  |
| Talopyranose                           | <b>-1.358</b>           | -0.056                  | 0.210                   | <b>-2.280</b>                 | 0.218                         | -0.138                        | RI                            | Not found                                  |
| D-Glucose (Z)                          | -2.042                  | 0.095                   | 0.123                   | -2.940                        | <b>0.311</b>                  | -0.073                        | SD                            | C00221                                     |
| Galactose                              | <b>-1.190</b>           | 0.132                   | -0.134                  | <b>-2.498</b>                 | 0.988                         | 0.172                         | SD                            | C00124                                     |
| Talose                                 | <b>-1.619</b>           | -0.161                  | -0.371                  | <b>-2.526</b>                 | 0.662                         | 0.187                         | RI                            | C06467                                     |
| Glucose                                | <b>-1.346</b>           | -0.101                  | -0.328                  | <b>-2.250</b>                 | <b>0.781</b>                  | 0.239                         | SD                            | C00031                                     |
| 1-Methyl- $\alpha$ -D-glucopyranoside  | -4.026                  | 0.178                   | 0.181                   | -4.979                        | <b>3.363</b>                  | <b>2.293</b>                  | RI                            | C00388                                     |
| Glucopyranose isomer1                  | <b>-2.082</b>           | 0.083                   | 0.214                   | <b>-8.094</b>                 | 0.402                         | -0.150                        | RI                            | C00221                                     |
| Galactonate                            | <b>1.375</b>            | 0.869                   | 0.225                   | <b>-5.098</b>                 | <b>1.285</b>                  | <b>0.645</b>                  | RI                            | C00880                                     |
| myo-Inositol                           | 0.772                   | 0.514                   | <b>0.846</b>            | -1.477                        | <b>0.627</b>                  | <b>1.016</b>                  | RI                            | C00137,D08079,<br>C01204,C06153,<br>D01813 |
| Glucopyranose isomer2                  | <b>2.682</b>            | <b>6.464</b>            | <b>5.412</b>            | -1.793                        | <b>0.676</b>                  | <b>5.562</b>                  | RI                            | C00031                                     |
| 1-Methyl- $\beta$ -D-galactopyranoside | <b>1.022</b>            | <b>9.361</b>            | <b>13.436</b>           | <b>-1.068</b>                 | <b>-3.702</b>                 | <b>14.408</b>                 | RI                            | C03619                                     |
| Galactosylglycerol                     | -0.174                  | <b>-0.922</b>           | <b>-0.640</b>           | <b>-4.127</b>                 | -0.102                        | -0.333                        | RI                            | C05401                                     |
| Glucose-6-phosphate                    | -0.011                  | -0.120                  | <b>-1.001</b>           | <b>-1.319</b>                 | <b>0.632</b>                  | -0.035                        | RI                            | C00668,C00092,<br>C02965                   |
| myo-Inositol-2-phosphate               | -0.955                  | -0.153                  | 0.083                   | -3.121                        | -0.241                        | -0.539                        | RI                            | C00137                                     |
| Maltitol                               | 0.245                   | <b>1.886</b>            | <b>-0.934</b>           | -0.276                        | 1.734                         | -1.233                        | RI                            | D04845                                     |

| Stages:<br>Metabolites:                                             | <i>shr</i> Co/<br>WT Co | <i>shr</i> Ca/<br>WT Ca | <i>shr</i> RS/<br>WT RS | <i>pctI-2</i><br>Co/<br>WT Co | <i>pctI-2</i><br>Ca/<br>WT Ca | <i>pctI-2</i><br>RS/<br>WT RS | Method<br>of<br>Detectio<br>n | KEGG ID                  |
|---------------------------------------------------------------------|-------------------------|-------------------------|-------------------------|-------------------------------|-------------------------------|-------------------------------|-------------------------------|--------------------------|
| 1,2,3-Butantriol                                                    | 0.555                   | <b>1.083</b>            | 0.047                   | -0.239                        | 0.808                         | 0.184                         | RI                            | Not found                |
| Cellobiose(isomer 1)                                                | -0.468                  | 3.629                   | -1.009                  | <b>-1.983</b>                 | 1.316                         | 3.224                         | RI                            | C06422,C00185            |
| Sucrose                                                             | 3.751                   | 0.114                   | 0.221                   | <b>3.666</b>                  | 0.008                         | -0.003                        | SD                            | C00089                   |
| Turanose (isomer 1)                                                 | <b>-0.418</b>           | 0.378                   | 0.183                   | <b>-2.572</b>                 | <b>2.538</b>                  | 16.585                        | RI                            | C19636                   |
| Cellobiose (isomer 2)                                               | <b>-1.274</b>           | 0.105                   | -7.093                  | <b>-2.229</b>                 | 1.839                         | 5.575                         | RI                            | C06422                   |
| Turanose (isomer 2)                                                 | 1.928                   | -10.49                  | 0.222                   | <b>1.798</b>                  | 1.430                         | 13.745                        | RI                            | C19636                   |
| Trehalose                                                           | -8.720                  | 0.340                   | -0.399                  | 1.193                         | 0.635                         | -0.614                        | RI                            | C01083                   |
| $\alpha$ -D-Galactopyranosyl<br>$\alpha$ -(1,4)-D-galactopyranoside | <b>-1.933</b>           | 0.326                   | -0.091                  | <b>-2.211</b>                 | 1.111                         | 0.975                         | RI                            | Not found                |
| Lactose                                                             | <b>-1.672</b>           | 0.761                   | -0.367                  | <b>-2.490</b>                 | 1.357                         | 2.259                         | RI                            | C01970                   |
| Isomaltose                                                          | <b>-1.293</b>           | -0.117                  | <b>-0.890</b>           | <b>-2.189</b>                 | 0.228                         | 1.422                         | RI                            | C00252                   |
| Valine                                                              | -1.199                  | <b>1.315</b>            | 0.199                   | -3.029                        | <b>0.557</b>                  | 0.528                         | RI                            | C00183                   |
| Alanine                                                             | 0.948                   | 0.165                   | <b>0.523</b>            | <b>-2.193</b>                 | <b>0.674</b>                  | -0.497                        | RI                            | C00041                   |
| Serine                                                              | -1.045                  | 0.199                   | <b>0.393</b>            | -6.024                        | <b>-0.450</b>                 | 0.235                         | RI                            | C00065                   |
| Threonine                                                           | 0.070                   | 0.813                   | <b>0.412</b>            | -2.121                        | <b>0.208</b>                  | 0.201                         | RI                            | C00188                   |
| Isoleucine                                                          | <b>-1.278</b>           | <b>1.400</b>            | 0.161                   | -2.250                        | <b>0.955</b>                  | 0.177                         | RI                            | C00407                   |
| Proline                                                             | -2.473                  | 1.241                   | <b>1.705</b>            | -0.479                        | <b>0.553</b>                  | 1.163                         | RI                            | C00148,D00035,<br>C00763 |
| Glycine                                                             | 0.468                   | 0.358                   | <b>0.148</b>            | -1.208                        | <b>1.190</b>                  | -0.021                        | RI                            | C00037                   |
| Aspartate                                                           | <b>-1.341</b>           | 0.638                   | 0.296                   | <b>-2.324</b>                 | <b>0.816</b>                  | 0.051                         | RI                            | C00049,D00013            |
| Threonate                                                           | -1.408                  | 2.038                   | 3.319                   | -2.155                        | 0.600                         | 4.668                         | RI                            | C01620                   |
| Glutamate                                                           | <b>1.758</b>            | 1.000                   | -0.201                  | <b>-0.524</b>                 | -0.069                        | -1.988                        | RI                            | C00025                   |
| Phenylalanine                                                       | <b>-1.417</b>           | 0.191                   | -0.132                  | <b>-2.249</b>                 | -0.117                        | -0.837                        | RI                            | C02057                   |
| Asparagine                                                          | 0.271                   | 1.485                   | 0.571                   | <b>0.888</b>                  | <b>-0.800</b>                 | -0.886                        | RI                            | C00152                   |
| Glutamine                                                           | -0.400                  | 0.223                   | 0.190                   | -0.247                        | <b>-1.854</b>                 | -2.091                        | RI                            | C00064                   |
| Lysine                                                              | 0.311                   | <b>2.389</b>            | <b>1.372</b>            | 0.748                         | <b>0.997</b>                  | 1.648                         | RI                            | C00047                   |
| Allantoin                                                           | 1.984                   | -0.951                  | 0.340                   | -0.428                        | <b>10.490</b>                 | -0.182                        | RI                            | C01551                   |
| Pentonate                                                           | <b>-1.449</b>           | -1.824                  | -0.233                  | <b>-2.302</b>                 | -0.193                        | -0.312                        | RI                            | Not found                |
| Lyxonate                                                            | <b>-1.311</b>           | <b>0.785</b>            | 0.173                   | <b>-2.151</b>                 | 0.339                         | 0.593                         | RI                            | Not found                |
| Gluconate                                                           | <b>-1.094</b>           | -0.022                  | <b>-0.842</b>           | <b>-2.429</b>                 | 0.339                         | 0.775                         | RI                            | C00257                   |
| Palmitate                                                           | <b>-1.638</b>           | -0.115                  | 0.580                   | <b>-2.494</b>                 | -0.082                        | 0.139                         | RI                            | C00249,D05341            |
| Glucarate                                                           | -0.253                  | <b>1.387</b>            | <b>0.380</b>            | <b>-1.938</b>                 | <b>1.248</b>                  | 1.049                         | RI                            | C00818                   |
| Galactarate                                                         | -0.959                  | 0.522                   | 0.076                   | <b>-2.027</b>                 | <b>2.006</b>                  | 0.041                         | RI                            | C00879                   |
| Linoleate                                                           | <b>-1.323</b>           | -0.187                  | -0.409                  | <b>-2.130</b>                 | -0.017                        | -0.815                        | RI                            | C01595                   |
| Stearate                                                            | <b>0.601</b>            | -0.333                  | <b>0.575</b>            | <b>-1.482</b>                 | -0.133                        | 0.421                         | RI                            | C01530                   |
| Sinapinate                                                          | <b>1.338</b>            | 4.969                   | <b>2.708</b>            | <b>-0.749</b>                 | <b>2.393</b>                  | 3.326                         | RI                            | C00482                   |

| <b>Stages:</b><br><b>Metabolites:</b> | <i>shr</i> Co/<br>WT Co | <i>shr</i> Ca/<br>WT Ca | <i>shr</i> RS/<br>WT RS | <i>pctI-2</i><br>Co/<br>WT Co | <i>pctI-2</i><br>Ca/<br>WT Ca | <i>pctI-2</i><br>RS/<br>WT RS | Method<br>of<br>Detectio<br>n | KEGG ID                  |
|---------------------------------------|-------------------------|-------------------------|-------------------------|-------------------------------|-------------------------------|-------------------------------|-------------------------------|--------------------------|
| Caffeoylquininate                     | -0.594                  | 10.909                  | 0.002                   | -0.123                        | 9.876                         | 0.298                         | RI                            | Not found                |
| Ethanolamine                          | 2.460                   | 0.610                   | 0.096                   | 0.598                         | <b>0.564</b>                  | 0.162                         | RI                            | C00189,D05074            |
| Ethanolaminephosphate                 | <b>-1.311</b>           | <b>0.850</b>            | 0.460                   | <b>-2.250</b>                 | -1.766                        | -10.635                       | RI                            | C14535                   |
| Dopamine                              | <b>-0.917</b>           | <b>0.709</b>            | <b>0.810</b>            | <b>-2.865</b>                 | 0.223                         | 2.111                         | RI                            | C03758,D07870            |
| Normetadrenaline                      | -1.616                  | <b>1.644</b>            | 0.145                   | -1.980                        | <b>1.988</b>                  | 0.696                         | RI                            | Not found                |
| Noradrenaline                         | -0.869                  | <b>2.013</b>            | <b>0.528</b>            | <b>-2.254</b>                 | <b>0.612</b>                  | 1.330                         | RI                            | C00547,D00076            |
| 5-Hydroxytryptamine                   | <b>-1.293</b>           | <b>1.529</b>            | <b>3.284</b>            | <b>-2.149</b>                 | <b>-1.322</b>                 | 2.564                         | RI                            | C00780                   |
| Pyridine, 2-hydroxy                   | <b>-1.365</b>           | 0.021                   | 0.123                   | <b>-1.775</b>                 | 0.267                         | 1.008                         | RI                            | C00747                   |
| Uridine                               | <b>-1.272</b>           | -0.524                  | -0.178                  | -0.594                        | 1.357                         | -1.008                        | RI                            | C00299                   |
| Adenosine                             | -0.261                  | 0.183                   | <b>0.453</b>            | <b>-1.549</b>                 | 0.661                         | 0.184                         | RI                            | C00212                   |
| Borate                                | -1.506                  | -0.028                  | 0.414                   | -0.651                        | 0.234                         | 0.529                         | RI                            | C12486                   |
| Pyruvate isomer 1                     | <b>-1.311</b>           | <b>1.154</b>            | -0.045                  | <b>-2.292</b>                 | 0.791                         | 2.543                         | RI                            | C00022                   |
| 1,3-Propanediol                       | <b>-1.280</b>           | -0.271                  | -0.028                  | <b>-0.990</b>                 | 0.625                         | 0.068                         | RI                            | C02457                   |
| Lactate                               | 0.377                   | -0.304                  | 0.291                   | -7.427                        | 3.240                         | 1.127                         | RI                            | C01432                   |
| Glycolate                             | <b>-5.824</b>           | 0.291                   | 0.372                   | <b>-2.257</b>                 | 1.513                         | 0.127                         | RI                            | C00160                   |
| Pyruvate isomer 2                     | -6.627                  | <b>0.619</b>            | 0.469                   | -7.541                        | 0.691                         | 0.659                         | RI                            | C00022                   |
| Oxalate                               | -6.174                  | -0.111                  | -0.008                  | -7.014                        | -0.374                        | -0.623                        | RI                            | C00209                   |
| (R)-3-Hydroxybutyric acid             | <b>7.754</b>            | <b>1.132</b>            | <b>7.262</b>            | 6.167                         | 6.026                         | 8.606                         | RI                            | C01089                   |
| Phosphate                             | <b>-1.320</b>           | <b>0.871</b>            | 0.435                   | <b>-2.200</b>                 | 0.620                         | -0.238                        | RI                            | C00009,D05467            |
| Succinate                             | <b>-1.359</b>           | <b>0.898</b>            | 0.175                   | <b>-2.199</b>                 | 1.644                         | 0.094                         | RI                            | C00042                   |
| Glycerate                             | 0.226                   | <b>1.120</b>            | 0.229                   | <b>-2.213</b>                 | 1.680                         | 0.007                         | RI                            | C00258                   |
| 3-Methyl-2-ketopiperazine             | <b>0.708</b>            | 0.397                   | 0.345                   | <b>-1.315</b>                 | 0.013                         | -0.053                        | RI                            | Not found                |
| Pipecolate                            | <b>0.899</b>            | 2.367                   | 0.363                   | <b>-0.878</b>                 | 1.441                         | 3.461                         | RI                            | Not found                |
| Malate, 2-methyl-                     | <b>-1.468</b>           | -0.302                  | 0.179                   | <b>-2.292</b>                 | -8.725                        | 1.145                         | RI                            | C00711,C03668,<br>D04843 |
| Malate                                | -4.087                  | 14.943                  | 16.190                  | -1.358                        | 18.184                        | 17.199                        | RI                            | C00711                   |
| 5-Oxoproline                          | 1.543                   | -0.270                  | 0.408                   | -3.058                        | -1.292                        | -0.076                        | RI                            | C01879                   |
| GABA                                  | 1.493                   | <b>-0.374</b>           | 0.001                   | -1.247                        | 1.280                         | -0.469                        | RI                            | C00334                   |
| Erythronate                           | -1.286                  | <b>4.272</b>            | 2.451                   | 2.646                         | -5.548                        | 4.260                         | RI                            | Not found                |
| 2-Imidazolidone-4-carboxylic acid     | 1.513                   | <b>0.597</b>            | <b>0.636</b>            | <b>-2.268</b>                 | -0.601                        | -0.096                        | RI                            | Not found                |
| Pentanedioic acid                     | -1.468                  | 0.472                   | <b>0.423</b>            | -2.336                        | 0.080                         | 0.136                         | RI                            | C00489                   |
| Citrate                               | <b>-1.319</b>           | <b>-0.425</b>           | -0.581                  | <b>-2.291</b>                 | 1.226                         | -0.885                        | RI                            | C00158,D00037            |
| Quinate                               | <b>-0.695</b>           | <b>3.471</b>            | 2.323                   | <b>-2.193</b>                 | 2.534                         | 3.962                         | RI                            | Not found                |
| Caffeate                              | <b>-0.949</b>           | 4.617                   | 6.072                   | <b>-3.057</b>                 | 6.204                         | 6.875                         | RI                            | C01197,C01481            |
