# Supplementary material for: Metabolomic homeostasis shifts after callus formation and shoot regeneration in tomato
Source: PubMed Central journal article supplement (PMC5421760; doi:10.1371/journal.pone.0176978), 2017-05-08

(A) WT

Callus/cotyledon

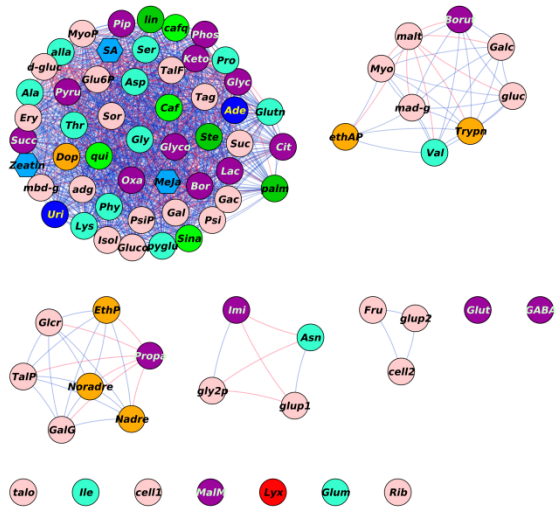

Regenerated shoot/callus

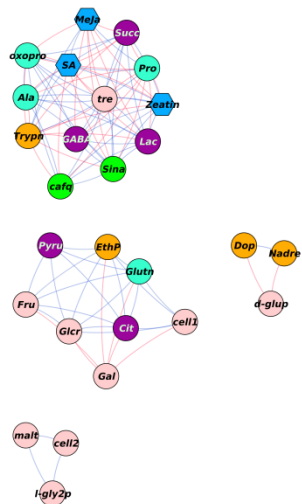

(B) *shr*

Callus/cotyledon

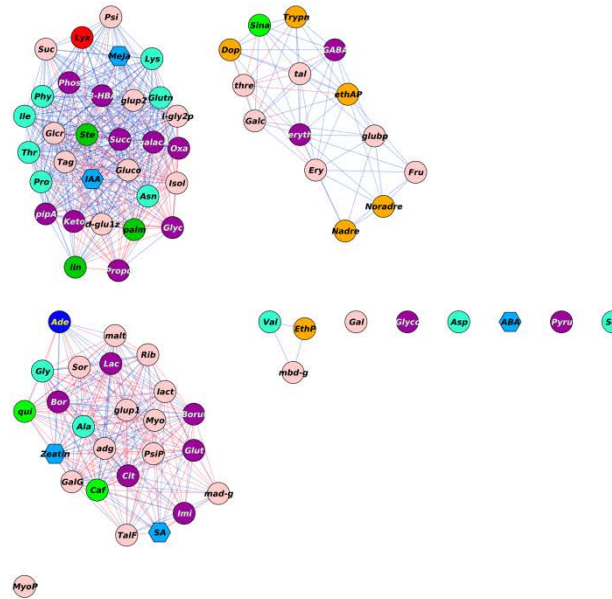

Regenerated shoot/callus

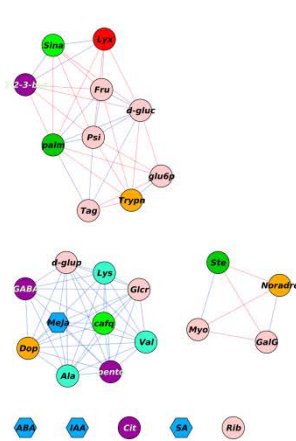

(C) *pct1-2*

Callus/cotyledon

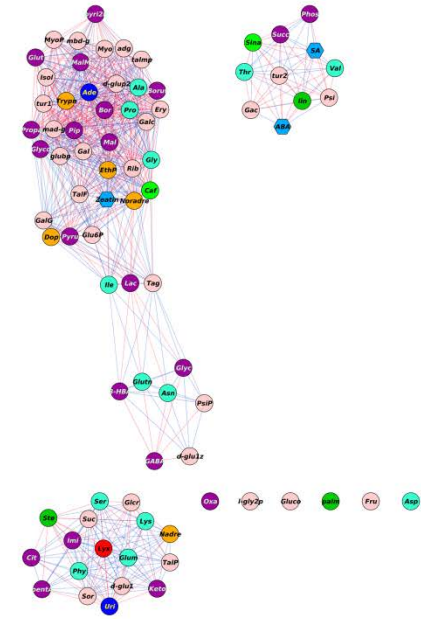

Regenerated shoot/callus

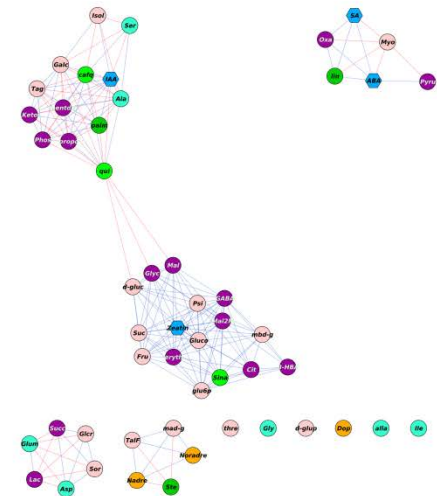

Supplement: pone.0176978.s011.pdf [file pone.0176978.s011.pdf]
