# Supplementary material for: Metabolomic homeostasis shifts after callus formation and shoot regeneration in tomato
Source: PubMed Central journal article supplement (PMC5421760; doi:10.1371/journal.pone.0176978), 2017-05-08

(A) WT

WT callus/cotyledon (k=8)

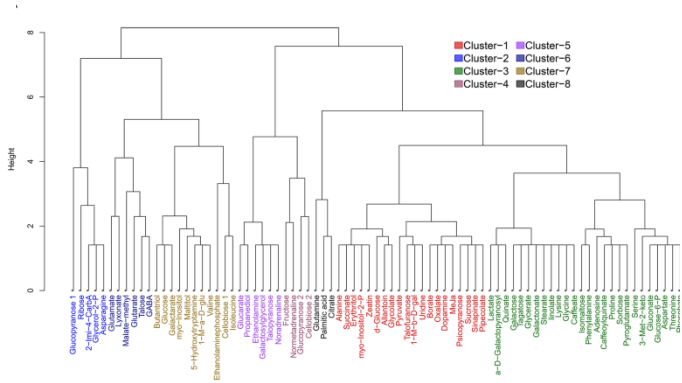

(B) *shr*

*shr* callus/cotyledon (k=8)

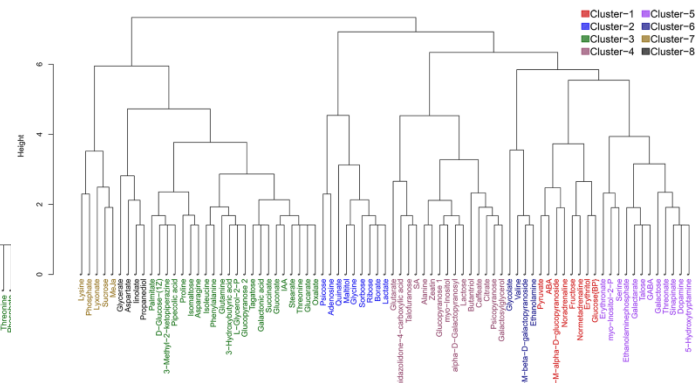

(C) *pct1-2*

*pct1-2* cotyledon/callus (k=8)

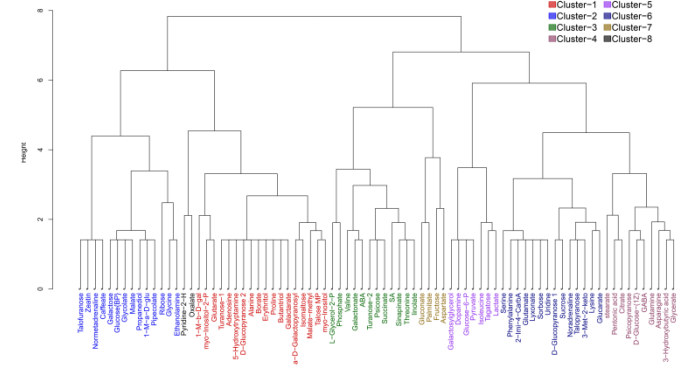

WT regenerated shoot/ callus (k=8)

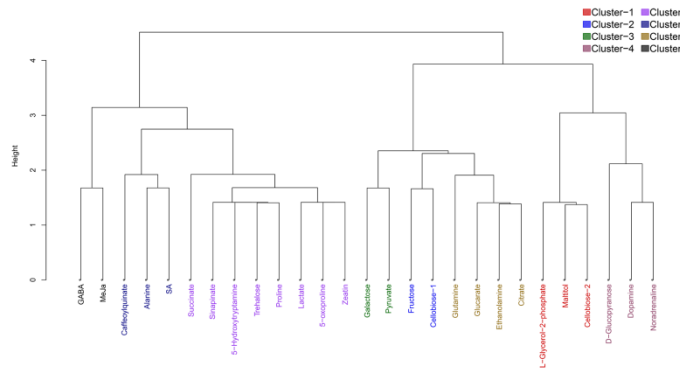

*shr* regenerated shoot/callus (k=8)

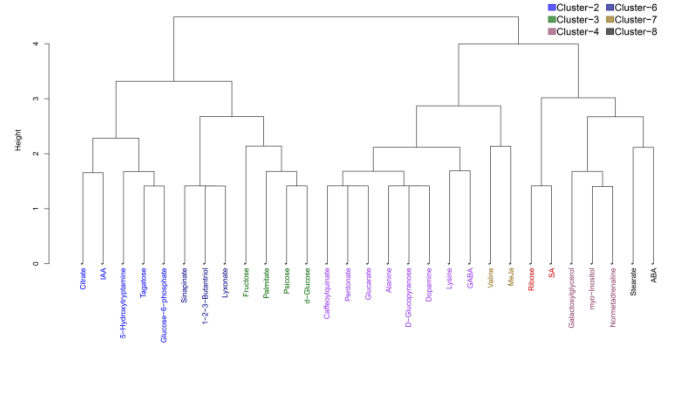

*pct1-2* regenerated shoot/callus (k=8)

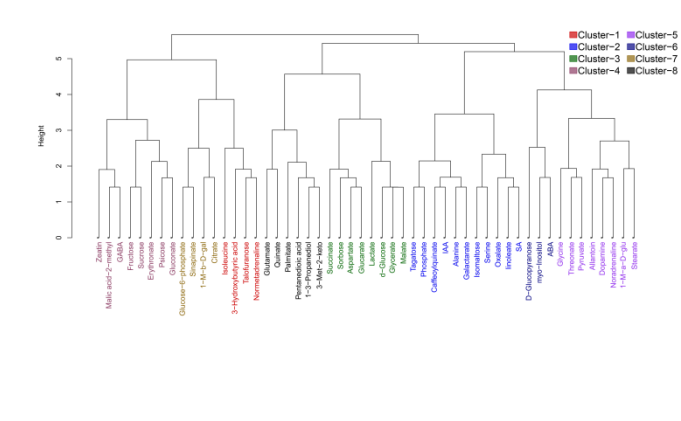

Supplement: pone.0176978.s012.pdf [file pone.0176978.s012.pdf]
